# Supplementary material
Source: PubMed Central journal article supplement (PMC4112091)
Supplement: NIHMS609156-supplement-supplemental_data.pdf [file NIHMS609156-supplement-supplemental_data.pdf]

# Analytical and Bioanalytical Chemistry

## Electronic Supplementary Material

### Complementary precursor ion and neutral loss scan mode tandem mass spectrometry for the analysis of glycerophosphatidylethanolamine lipids from whole rat retina

Todd A. Lydic, Julia V. Busik, Walter J. Esselmann, Gavin E. Reid

**Supplementary Table 1.** Summary of glycerophosphatidylethanolamine (GPEtn) lipids identified from a whole rat retina crude lipid extract by complementary neutral loss and precursor ion scan mode tandem mass spectrometry. Fatty acyl species were determined by negative ion mode product ion CID-MS/MS or by PI scans of  $m/z$  of specific fatty acids. Lipid nomenclature used is outlined in [26].

| Lipid Species                                      | Precursor Ion ( $m/z$ ) |                         |                        |                         |
|----------------------------------------------------|-------------------------|-------------------------|------------------------|-------------------------|
|                                                    | $[M+H]^+$ <sup>a</sup>  | $[M+Na]^+$ <sup>b</sup> | $[M-H]^-$ <sup>c</sup> | $[M+Cl]^-$ <sup>d</sup> |
| GPEtn <sub>(16:0/18:1)</sub>                       | 718                     | 740                     | 716                    | 752                     |
| GPEtn <sub>(16:0/18:0)</sub>                       | 720                     | 742                     | 718                    | 754                     |
| GPEtn <sub>(<i>p</i>-16:0/20:4)</sub> <sup>e</sup> | -                       | 746                     | 722                    | 758                     |
| GPEtn <sub>(<i>p</i>-36:3)</sub> <sup>e,f</sup>    | -                       | 748                     | -                      | -                       |
| GPEtn <sub>(<i>p</i>-36:1)</sub> <sup>e,f</sup>    | -                       | 752                     | -                      | -                       |
| GPEtn <sub>(16:0/20:4)</sub>                       | 740                     | 762                     | 738                    | 774                     |
| GPEtn <sub>(18:1/18:1)</sub>                       | 744                     | 766                     | -                      | 778                     |
| GPEtn <sub>(18:0/18:1)</sub>                       | 746                     | 768                     | 744                    | 780                     |

|                                             |     |     |     |     |
|---------------------------------------------|-----|-----|-----|-----|
| GPEtn <sub>(p-16:0/22:6)</sub> <sup>e</sup> | -   | 770 | 746 | 782 |
| GPEtn <sub>(p-16:0/22:5)</sub> <sup>e</sup> | 750 | 772 | 748 | 784 |
| GPEtn <sub>(p-18:0/20:4)</sub> <sup>e</sup> | 752 | 774 | 750 | 786 |
| GPEtn <sub>(16:0/22:6)</sub>                | 764 | 786 | 762 | 798 |
| GPEtn <sub>(18:1/20:4)</sub>                | 766 | 788 | 764 | 800 |
| GPEtn <sub>(18:0/20:4)</sub>                | 768 | 790 | 766 | 802 |
| GPEtn <sub>(p-18:1/22:6)</sub> <sup>e</sup> | 774 | 796 | 772 | 808 |
| GPEtn <sub>(p-18:0/22:6)</sub> <sup>e</sup> | 776 | 798 | 774 | 810 |
| GPEtn <sub>(p-18:1/22:5)</sub> <sup>e</sup> | 778 | 800 | 776 | 812 |
| GPEtn <sub>(p-18:0/22:6)</sub> <sup>e</sup> | 778 | 800 | 776 | 812 |
| GPEtn <sub>(p-20:0/20:4)</sub> <sup>e</sup> | -   | 802 | 778 | 814 |
| GPEtn <sub>(18:2/22:6)</sub>                | 788 | 810 | 786 | -   |
| GPEtn <sub>(18:1/22:6)</sub>                | 790 | 812 | 788 | 824 |
| GPEtn <sub>(18:0/22:6)</sub>                | 792 | 814 | 790 | 826 |
| GPEtn <sub>(20:0/20:4)</sub>                | 796 | 818 | 794 | 830 |
| GPEtn <sub>(20:4/22:6)</sub>                | 812 | 834 | 810 | 846 |
| GPEtn <sub>(22:6/22:6)</sub>                | 836 | 858 | 834 | 870 |
| GPEtn <sub>(22:4/22:6)</sub>                | 840 | 862 | 838 | -   |

<sup>a</sup> Ions were detected by performing NL m/z 141.

<sup>b</sup> Ions were detected by performing NL m/z 43 or by PI m/z 164 in the presence of 500 μM NaCl.

<sup>c</sup> Ions detected by performing PI m/z 196.

<sup>d</sup> Ions detected by performing NL m/z 36.

<sup>e</sup> GPEtn lipids with a subscript  $p$  preceding a fatty acid designation refer to plasmeryl (alkenyl ether) subspecies. Plasmeryl ether linkages were confirmed by acid hydrolysis as described in the main text.

<sup>f</sup> Indicates a lipid for which precursor ions were not observed in negative ion mode, thereby preventing unambiguous assignment of the composition of the individual fatty acyl or alkyl chains. In these cases, the identities of these species are presented as GPEtn<sub>(total carbons : total double bonds)</sub>.
